# Supplementary material for: Simulating Irrational Human Behavior to Prevent Resource Depletion
Source: PubMed Central journal article supplement (PMC4356575; doi:10.1371/journal.pone.0117612), 2015-03-11

**Figure S1. The learning curve for non-cooperative personalities.** We fix  $h = 0.50$  and simulate the model for various  $d$  to see how the outcome of cooperation will improve for non-cooperative personalities. The results are shown for personality distribution of Algeria, Brazil, China, Croatia, Czech Republic and France.

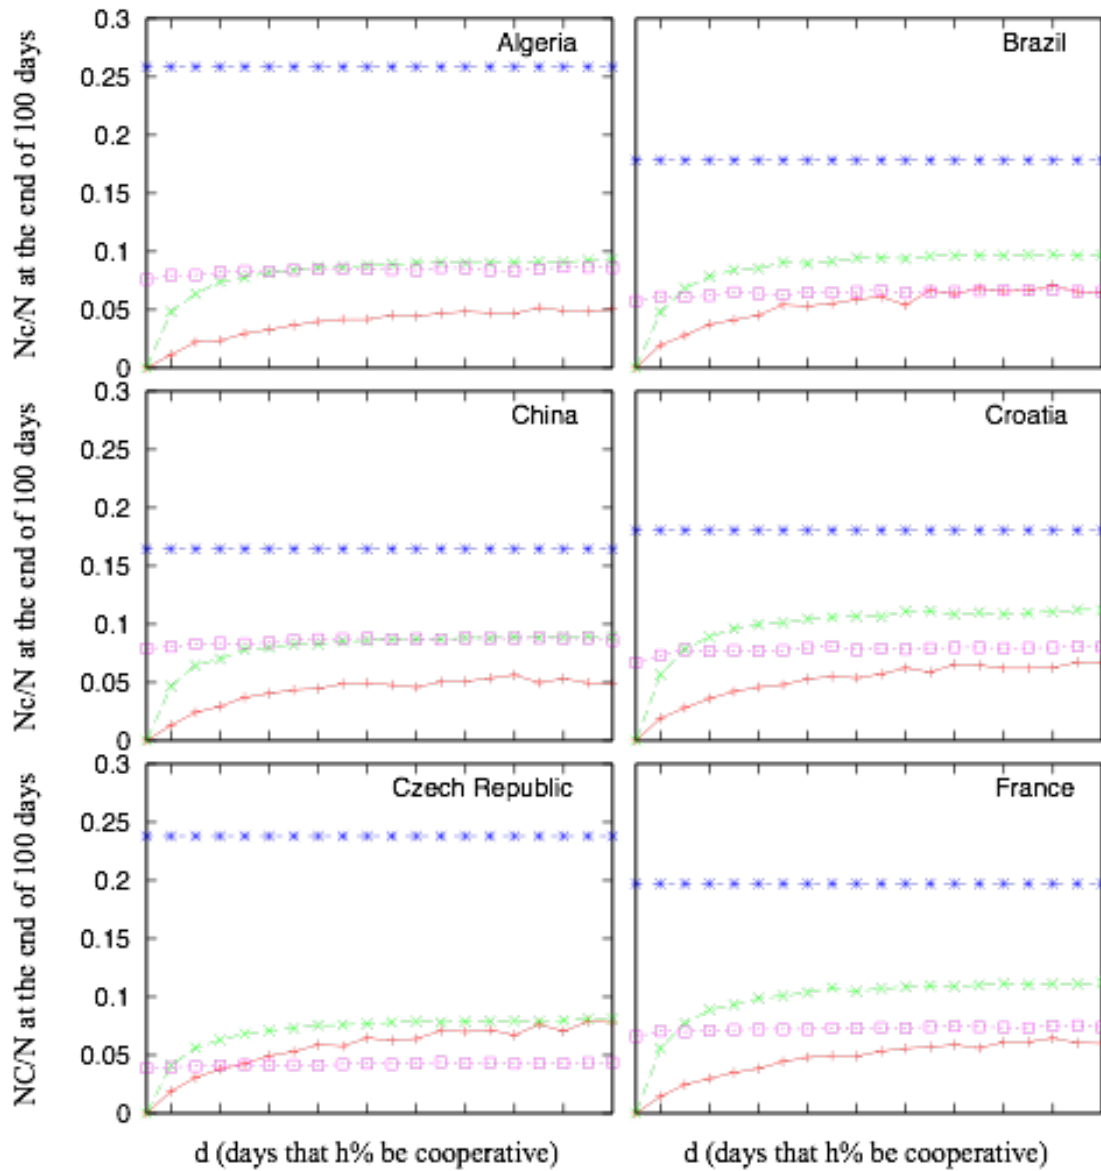

Supplement: pone.0117612.s001.pdf [file pone.0117612.s001.pdf]
