# Supplementary material for: Simulating Irrational Human Behavior to Prevent Resource Depletion
Source: PubMed Central journal article supplement (PMC4356575; doi:10.1371/journal.pone.0117612), 2015-03-11

**Figure S8. Fraction of overall cooperators index.** The contour plot of overall percentage of cooperators after 100 days depending on the control parameters  $h$  (policing efficiency) and  $d$  (days behavior changes). Horizontal axis shows value of  $d$  and vertical axis represents  $h$ . The results are shown for personality distribution of New Zealand, Poland, Portugal and Serbia.

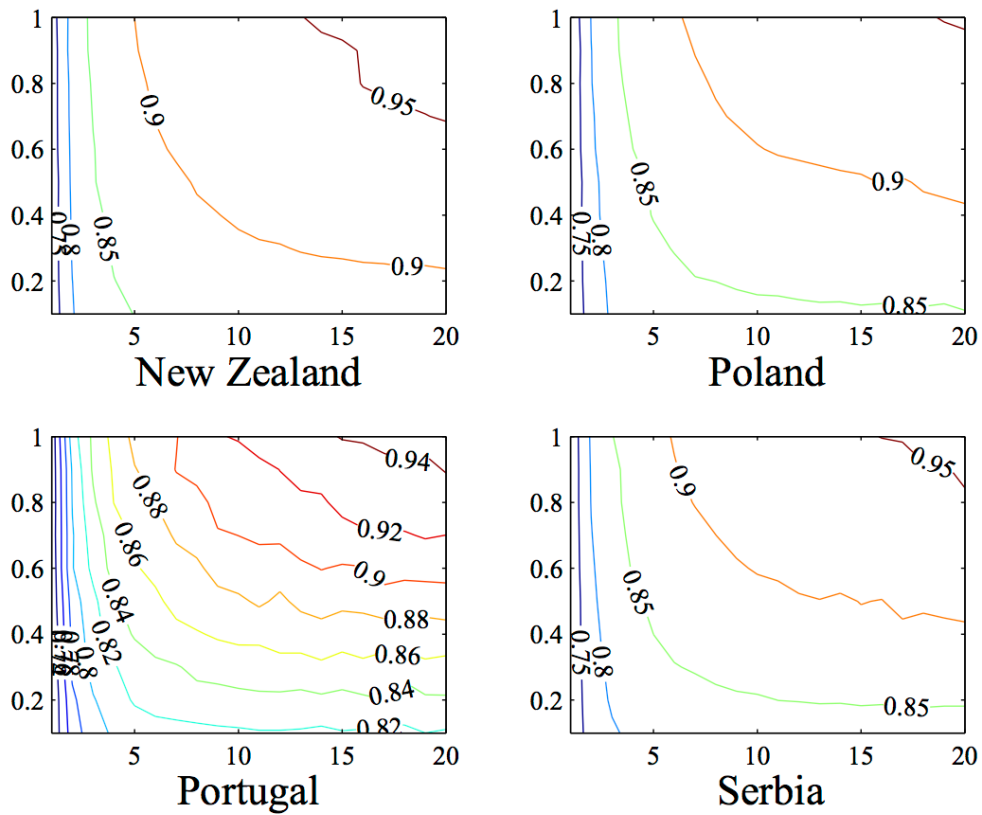

Supplement: pone.0117612.s008.pdf [file pone.0117612.s008.pdf]
