# Supplementary material for: Simulating Irrational Human Behavior to Prevent Resource Depletion
Source: PubMed Central journal article supplement (PMC4356575; doi:10.1371/journal.pone.0117612), 2015-03-11

**Figure S10. Non-linear association of Hofstede's Uncertainty Avoidance index with the cooperation index, resulting from simulation (100 days,  $h=0.50$ ,  $d=20$ ).**

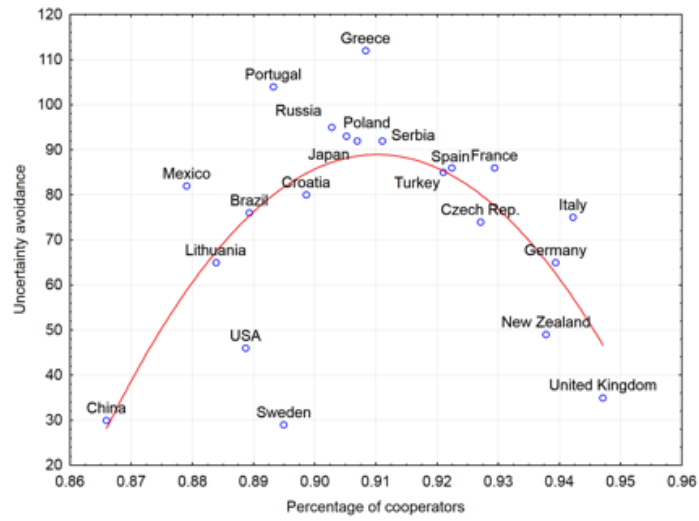

Supplement: pone.0117612.s010.pdf [file pone.0117612.s010.pdf]
