# Supplementary material for: Simulating Irrational Human Behavior to Prevent Resource Depletion
Source: PubMed Central journal article supplement (PMC4356575; doi:10.1371/journal.pone.0117612), 2015-03-11
Supplement: pone.0117612.s012.pdf [file pone.0117612.s012.pdf]

## **Text S2. Cooperation index for non-cooperative personalities as a function of day**

In the main text, we examined the cooperation index among non-cooperative personalities as a function of days that they cooperate ( $d$ ) for Sweden as an example. Here we display the same results for all 22 countries that are mentioned and studied in the main text. The control parameter  $h$  is set to 0.5. The horizontal axis displays day and vertical axis displays fraction of cooperators.
