# Supplementary material for: Simulating Irrational Human Behavior to Prevent Resource Depletion
Source: PubMed Central journal article supplement (PMC4356575; doi:10.1371/journal.pone.0117612), 2015-03-11
Supplement: pone.0117612.s013.pdf [file pone.0117612.s013.pdf]

**Text S3. Overall cooperation index as a function of days of cooperation and probability of cooperation among non-cooperative personalities.**

In the main text we examined the overall cooperation dependency on the two control parameters  $h$ (probability of cooperation among non-cooperative personalities) and  $d$ (days of cooperation among non-cooperative personalities) in the case of Sweden. Here we display the results for all 22 countries that are mentioned and studied in the main text. The horizontal axis displays parameter  $d$ (day) and vertical axis displays parameter  $h$ (cooperation probability), the contour lines display the overall fraction of cooperators.
